# Supplementary material for: Cross-linked multiblock copoly(arylene ether sulfone) ionomer/nano-ZrO2composite anion exchange membranes for alkaline fuel cells
Source: Royal Society of Chemistry journal article supplement (doi:10.1039/c4ra06519k), 2014-01-01
Supplement: c4ra06519k1.pdf [file c4ra06519k1.pdf]

## Supplementary Information

### Cross-linked multiblock copoly(arylene ether sulfone) ionomer/nano-ZrO<sub>2</sub> composite anion exchange membranes for alkaline fuel cells

**Xiuhua Li,<sup>\*,a,b</sup> Jinxiong Tao,<sup>a,b</sup> Guanghui Nie,<sup>a,b</sup> Liuchan Wang,<sup>a,b</sup> Liuhong Li,<sup>a,b</sup> Shijun Liao<sup>a,b</sup>**

<sup>a</sup> School of Chemistry & Chemical Engineering, South China University of Technology, Guangzhou 510641, P. R. China.

<sup>b</sup> The Key Laboratory of Fuel Cell Technology of Guangdong Province, South China University of Technology, Guangzhou 510641, P. R. China.

#### Corresponding Author

\*Tel & Fax: 8620 – 22236591. E-mail : [lixihua@scut.edu.cn](mailto:lixihua@scut.edu.cn)

#### I. Figures

#### II. Experimental section

## I. Figures

**Fig. S1**  $^1\text{H}$  NMR spectra of the hydroxyl-terminated hydrophilic oligomer X12.

**Fig. S2**  $^1\text{H}$  NMR spectra of the fluorine-terminated hydrophobic oligomer Y10.

**Fig. S3**  $^1\text{H}$  NMR spectra of MCPAES and BMCPAES.

**Fig. S4** SEM cross section images of CLQCPAES and CLQCPAES/nano- $\text{ZrO}_2$  composite membranes: (a,a') CLQCPAES, (b,b') CLQCPAES/2.5% $\text{ZrO}_2$ , (c,c') CLQCPAES/5% $\text{ZrO}_2$ , (d,d') CLQCPAES/7.5% $\text{ZrO}_2$ , and (e,e') CLQCPAES/10% $\text{ZrO}_2$ .

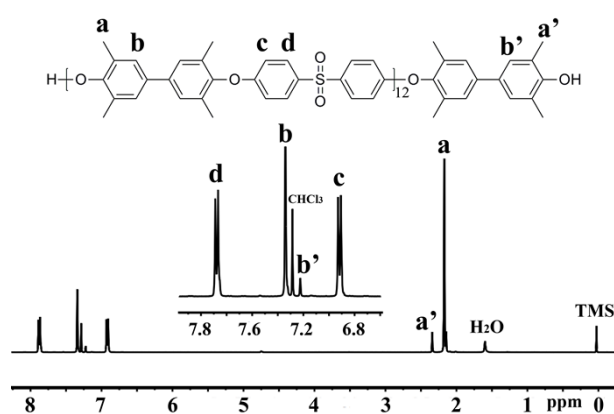

**Fig. S1**  $^1\text{H}$  NMR spectra of the hydroxyl-terminated hydrophilic oligomer X12 (The average oligomer length, which is calculated from the integral ratio of protons  $\text{a}'$  in the hydroxyl terminal biphenyl units to those protons  $\text{a}$  in biphenyl units belonging to repeat units, is 12.0).

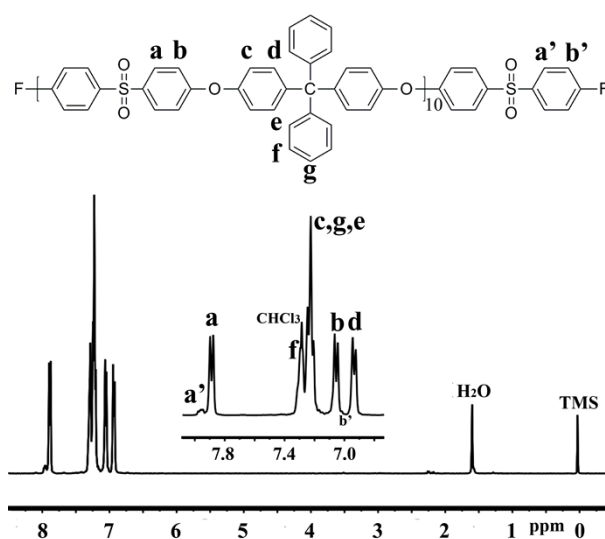

**Fig. S2**  $^1\text{H}$  NMR spectra of the fluorine-terminated hydrophobic oligomer Y10 (The average oligomer length, which is calculated from the integral ratio of protons  $\text{a}'$  in the fluorine-terminal biphenyl sulfone units to those protons  $\text{a}$  in biphenyl sulfone units belonging to repeat units, is 10.0).

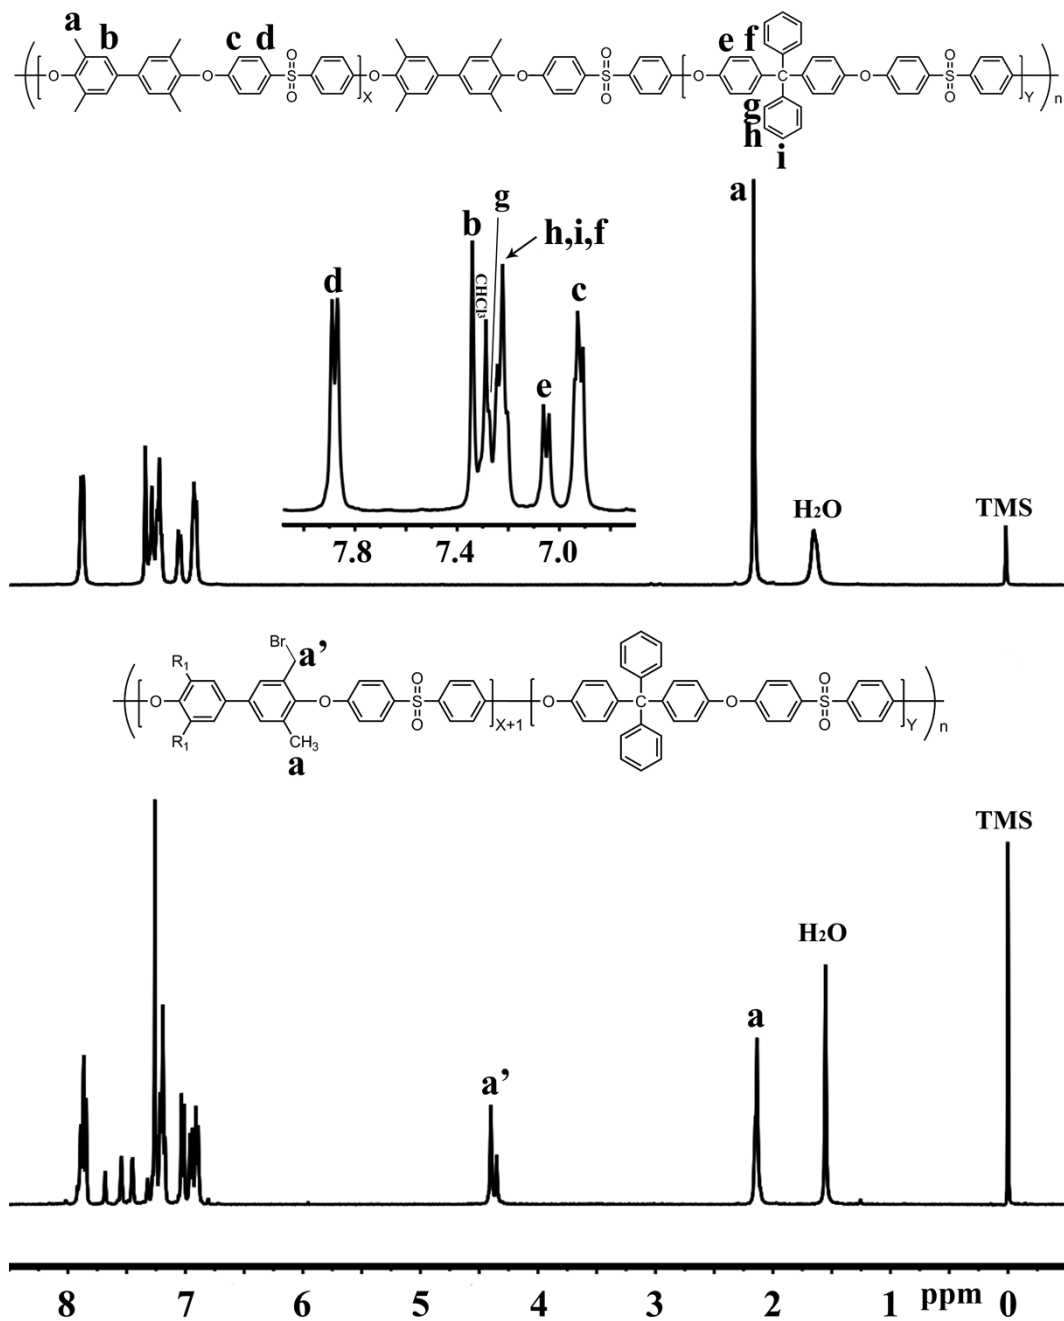

Fig. S3 <sup>1</sup>H NMR spectra of MCPAES and BMCPAES (The benzylmethyl bromide groups per repeating unit (DBM), which is calculated by the equation of  $DBM = 12H_{a'} / (3H_a + 2H_b)$ , is 1.87).

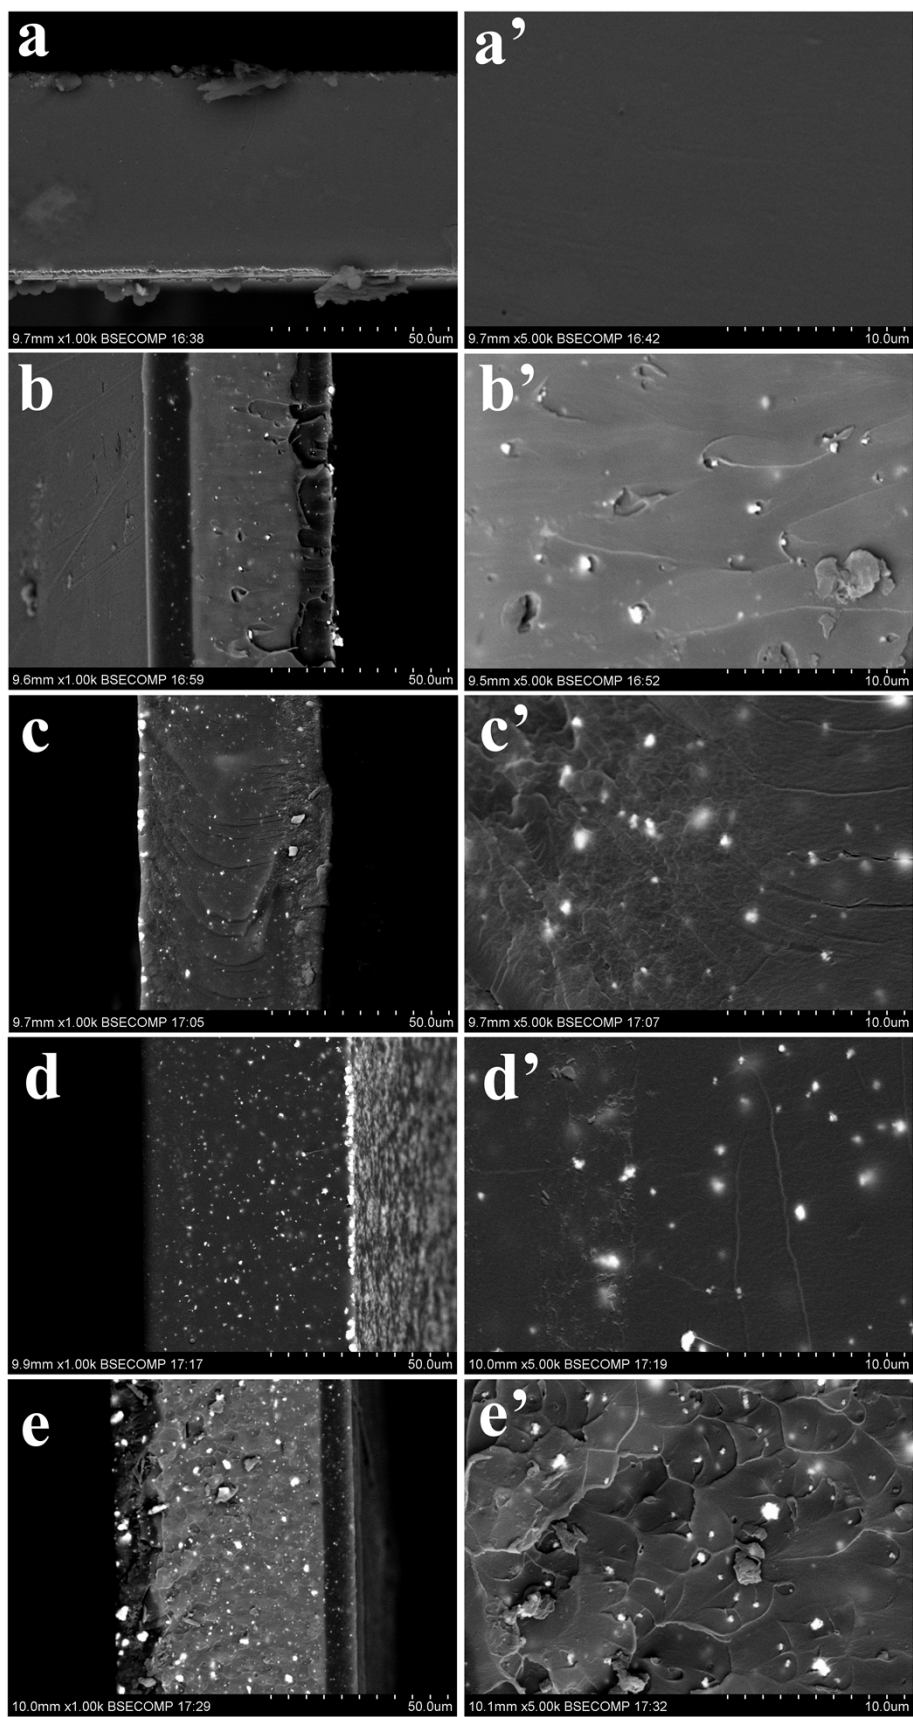

**Fig. S4** SEM cross section images of CLQCPAES and CLQCPAES/nano-ZrO<sub>2</sub> composite membranes: (a,a') CLQCPAES, (b,b') CLQCPAES/2.5%ZrO<sub>2</sub>, (c,c') CLQCPAES/5%ZrO<sub>2</sub>, (d,d') CLQCPAES/7.5%ZrO<sub>2</sub>, and (e,e') CLQCPAES/10%ZrO<sub>2</sub>.

## **II. Experimental section**

<sup>1</sup>H NMR spectra were obtained on a Bruker AVANCE 400S with CHCl<sub>3</sub> as the solvent and tetramethylsilane (TMS) as the standard. Scanning electron microscope (SEM) cross section images of the CLQCPAES and CLQCPAES/nano-ZrO<sub>2</sub> composite membranes were taken using a Hitachi S-3700N in BSECOMP mode.
